# Supplementary material for: Inhibition of inhibition in visual cortex: the logic of connections between molecularly distinct interneurons
Source: Springer Nature journal article supplement (doi:10.1038/nn.3446), 2013-06-30
Supplement: 41593_2013_BFnn3446_MOESM12_ESM.pdf [file 41593_2013_BFnn3446_MOESM12_ESM.pdf]

**Inhibition of Inhibition in Visual Cortex: The Logic of Connections Between Molecularly Distinct Interneurons**

Carsten K. Pfeffer<sup>1,2</sup>, Mingshan Xue<sup>2</sup>, Miao He<sup>3</sup>, Z. Josh Huang<sup>3</sup> and Massimo Scanziani<sup>1,2</sup>

*<sup>1</sup>Howard Hughes Medical Institute, <sup>2</sup>Center for Neural Circuits and Behavior, Neurobiology Section and Department of Neuroscience, University of California San Diego, La Jolla, California 92093-0634, USA*

*<sup>3</sup>Cold Spring Harbor Laboratory, Cold Spring Harbor, New York, USA*

**Supplementary figures and legends 1-9, supplementary table 1**

## Supplementary Figure 1

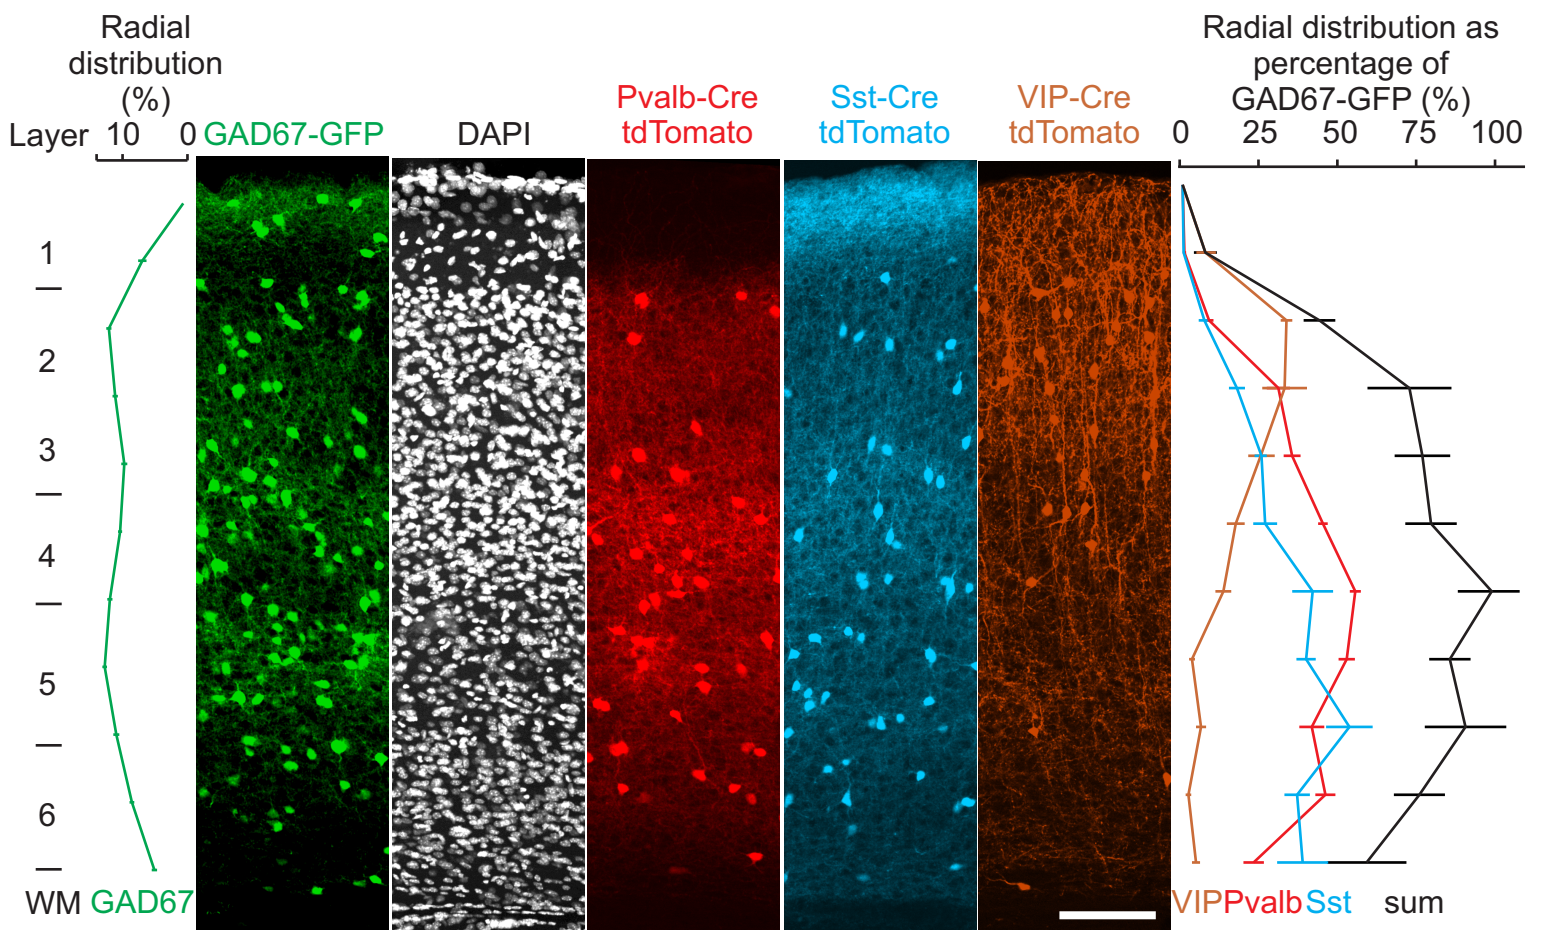

### Supplementary Figure 1

#### Distribution of interneurons in visual cortex

Confocal fluorescence images of coronal sections through V1 of triple transgenic mice in which the three Cre-driver lines were crossed with the ROSA-tdTomato line to report Cre expression and to the GAD67-GFP line to reveal all interneurons (GAD67-GFP: colored green; Pvalb-Cre: colored red; Sst-Cre: colored blue; VIP-Cre: colored brown). The nuclear DAPI staining (white; same section as Pvalb-Cre) is shown for reference. Layer borders are indicated on the left. The radial distribution of GAD67-GFP neurons is shown on the left. The radial distribution of Cre expressing cells as a percentage of GAD67-GFP cells in the corresponding radial bin is shown on the right. For quantification, the radial extent of the cortex (from the pia to the white matter) was divided into 10 bins of equal length. Note that all three interneuron classes sum up to more than 75% in layers 3 - 5 (black distribution on the right). Error bars represent s.e.m (Reporter line (n=cells/sections/mice), GAD67-GFP (5310/14/6), Pvalb (690/4/2), Sst (929/6/2), VIP (286/4/2). Cre expressing cells with no apparent GAD67-GFP label were excluded). White scale bar in the VIP-Cre tdTomato panel: 100 $\mu$ m.

# Supplementary Figure 2

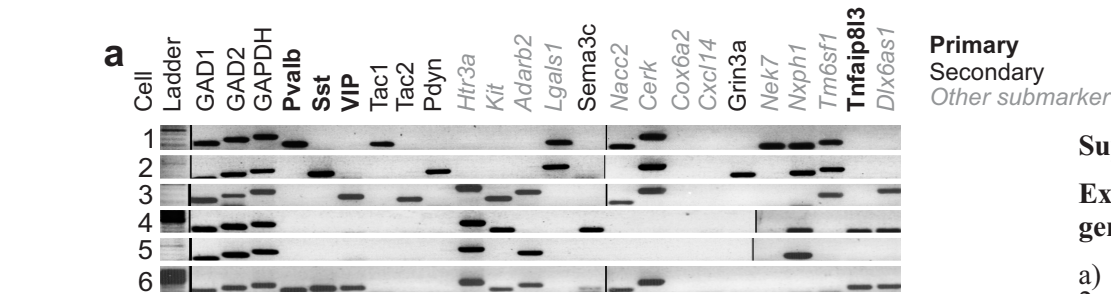

**Supplementary Figure 2:**

## Expression and coexpression of genes

a) Six example cells (same as in Fig. 2a, with all marker genes shown) whose genes were amplified by scRT-PCR. Cells are categorized according to their primary (bold) and secondary (gray, italic) gene expression: cell1-**Pvalb**/Tac1, cell2-**Sst**/Pdyn/Grin3a, cell3-**VIP**/Tac2, cell4-**Tnfaip813**/Sema3c, cell5-undefined, cell6-**Pvalb**/**Sst**/**VIP**/**Tnfaip813** (discarded).

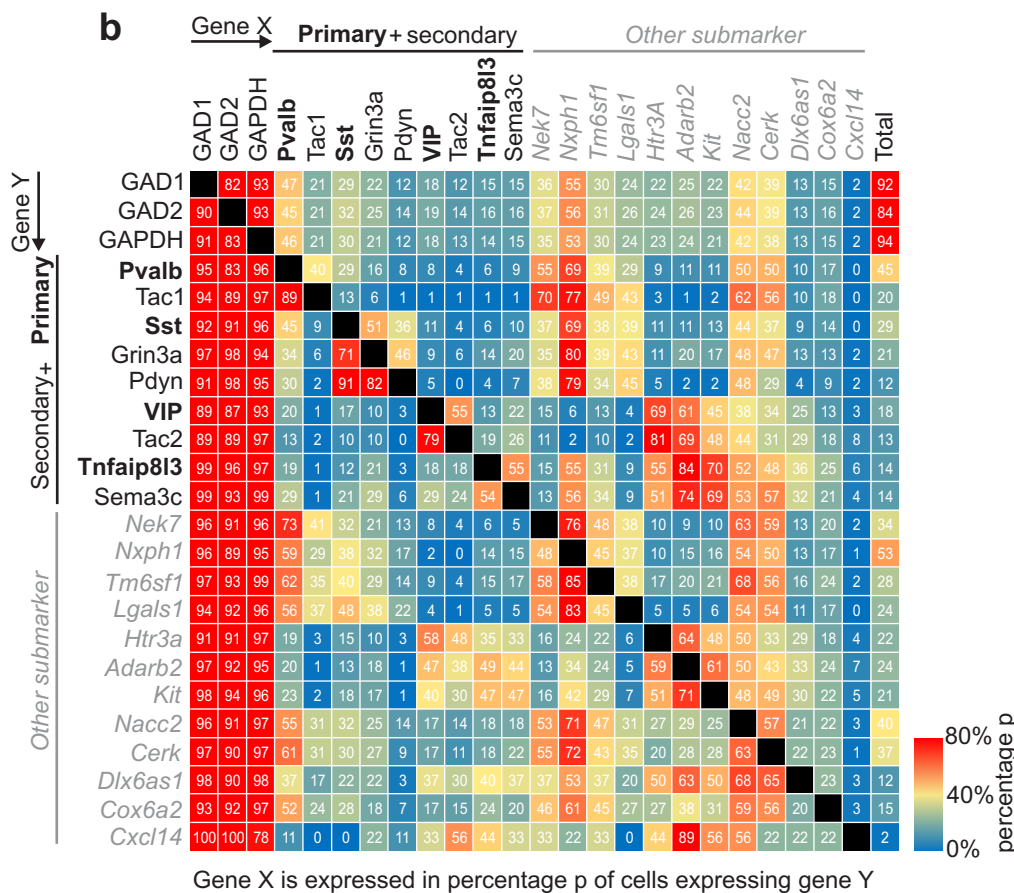

b) Heat map of coexpression of all genes tested (474 cells; 2 GABAergic genes (GAD1, GAD2); 1 housekeeping gene (GAPDH); 21 marker genes). Genes listed on the X-axis (Gene X) are expressed in percentage p (given by number and color of heat map) of cells expressing gene Y (Gene-Y) also express Pvalb (Gene-X). In contrast only 13% of cells expressing Tac1 also express Sst.

c) Expression pattern of all marker genes in 474 cells. Each row is a different cell; each column is a different gene. The color of the four primary markers (Pvalb, Sst, VIP, Tnfaip813) is the same as the color of the co-expressed secondary markers. Cells are grouped in different categories (labeled on the right) according to their primary and secondary marker expression pattern.

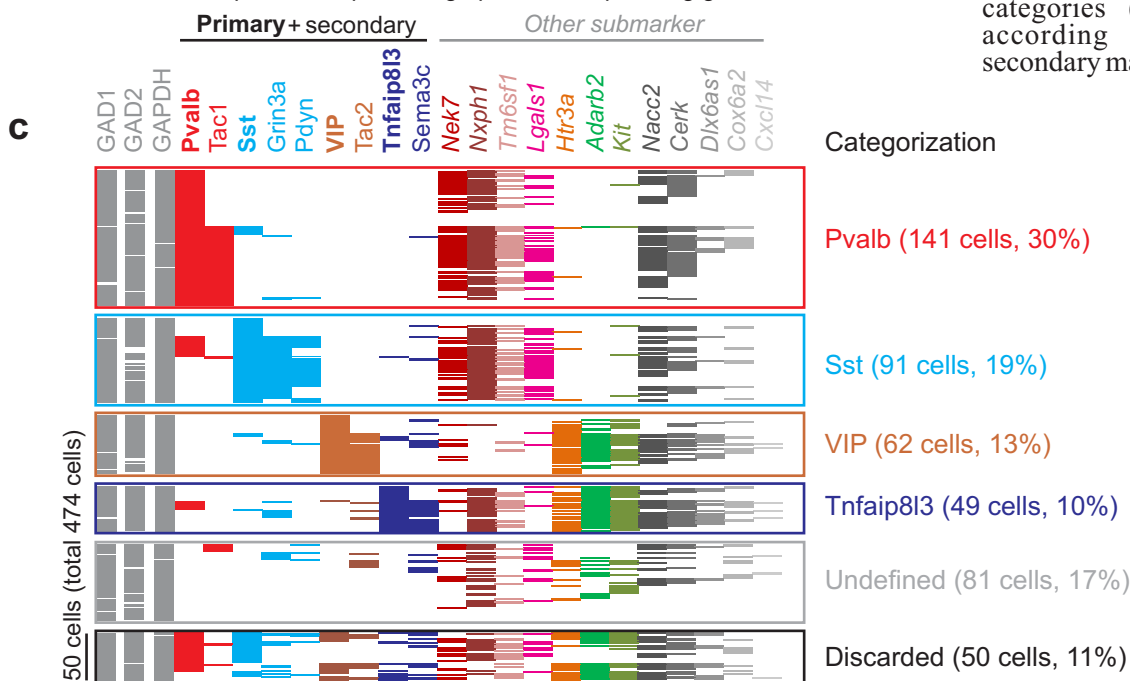

## Supplementary Figure 3

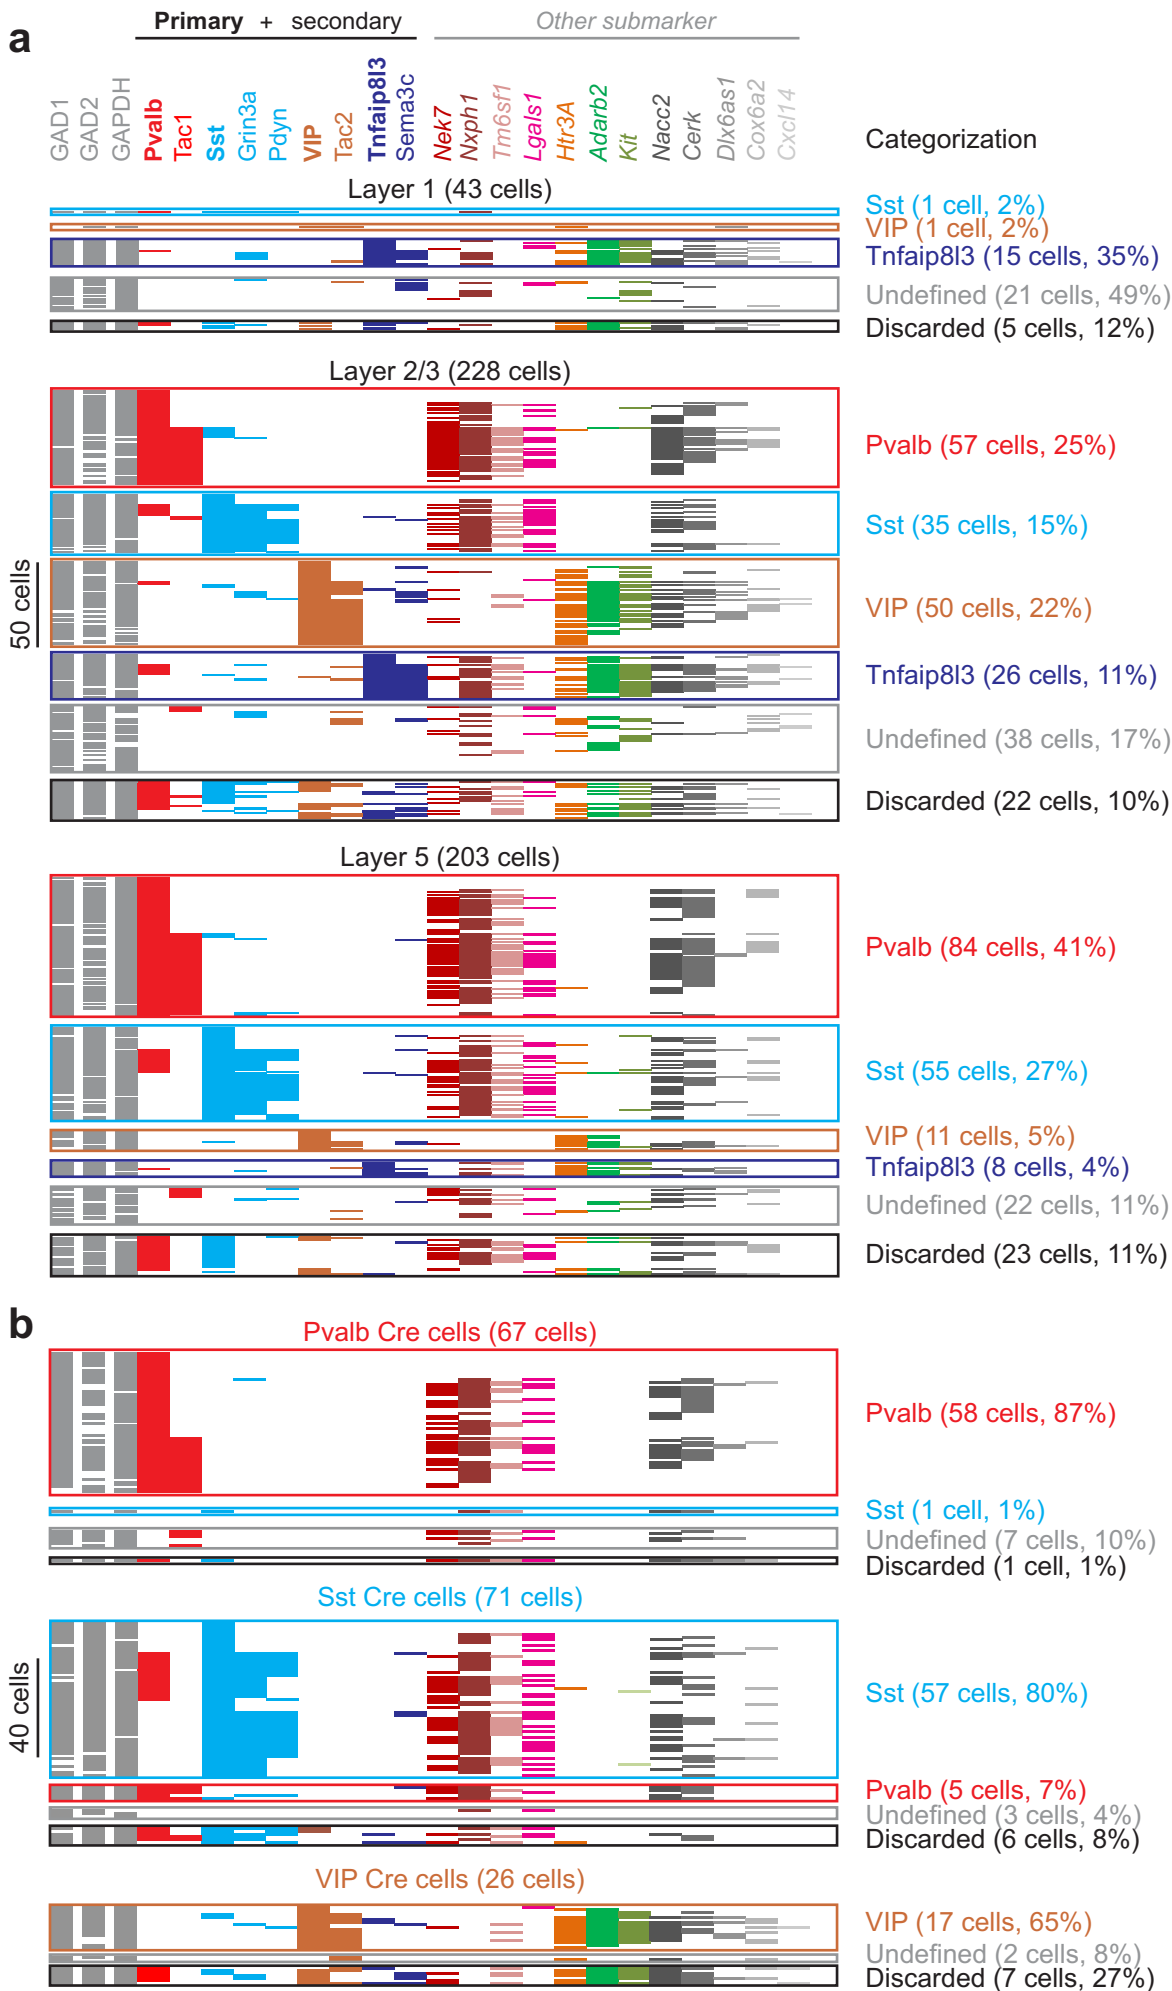

### Supplementary Figure 3:

#### Interneuron categories and their gene expression patterns by layers and Cre-lines.

a) Expression pattern of all marker genes in 474 cells. Each row is a different cell; each column is a different gene. The color of the four primary markers (Pvalb, Sst, VIP, Tnfaip813) is the same as the color of the co-expressed secondary markers. Cells are sorted according to layer and grouped in different categories (labeled on the right) according to their primary and secondary marker expression pattern. The relative abundance of sampled cells across layers does not necessarily represent their natural distribution because of sampling biases occurring when using specific lines for targeting interneurons (e.g. Gin, HTR3a-GFP, Pvalb-Cre).

b) Expression patterns of all marker genes in Pvalb-Cre expressing cells (top), Sst-Cre expressing cells (middle) and VIP-Cre expressing cells (bottom). Each row is a different cell; each column is a different gene. The color of the four primary markers (Pvalb, Sst, VIP, Tnfaip813) is the same as the color of the co-expressed secondary markers. Cells are grouped in different categories (labeled on the right) according to their primary and secondary expression pattern.

Note that the categorization based on the gene expression pattern matches the cell class defined by the Cre-driver line for the vast majority of cells.

# Supplementary Figure 4

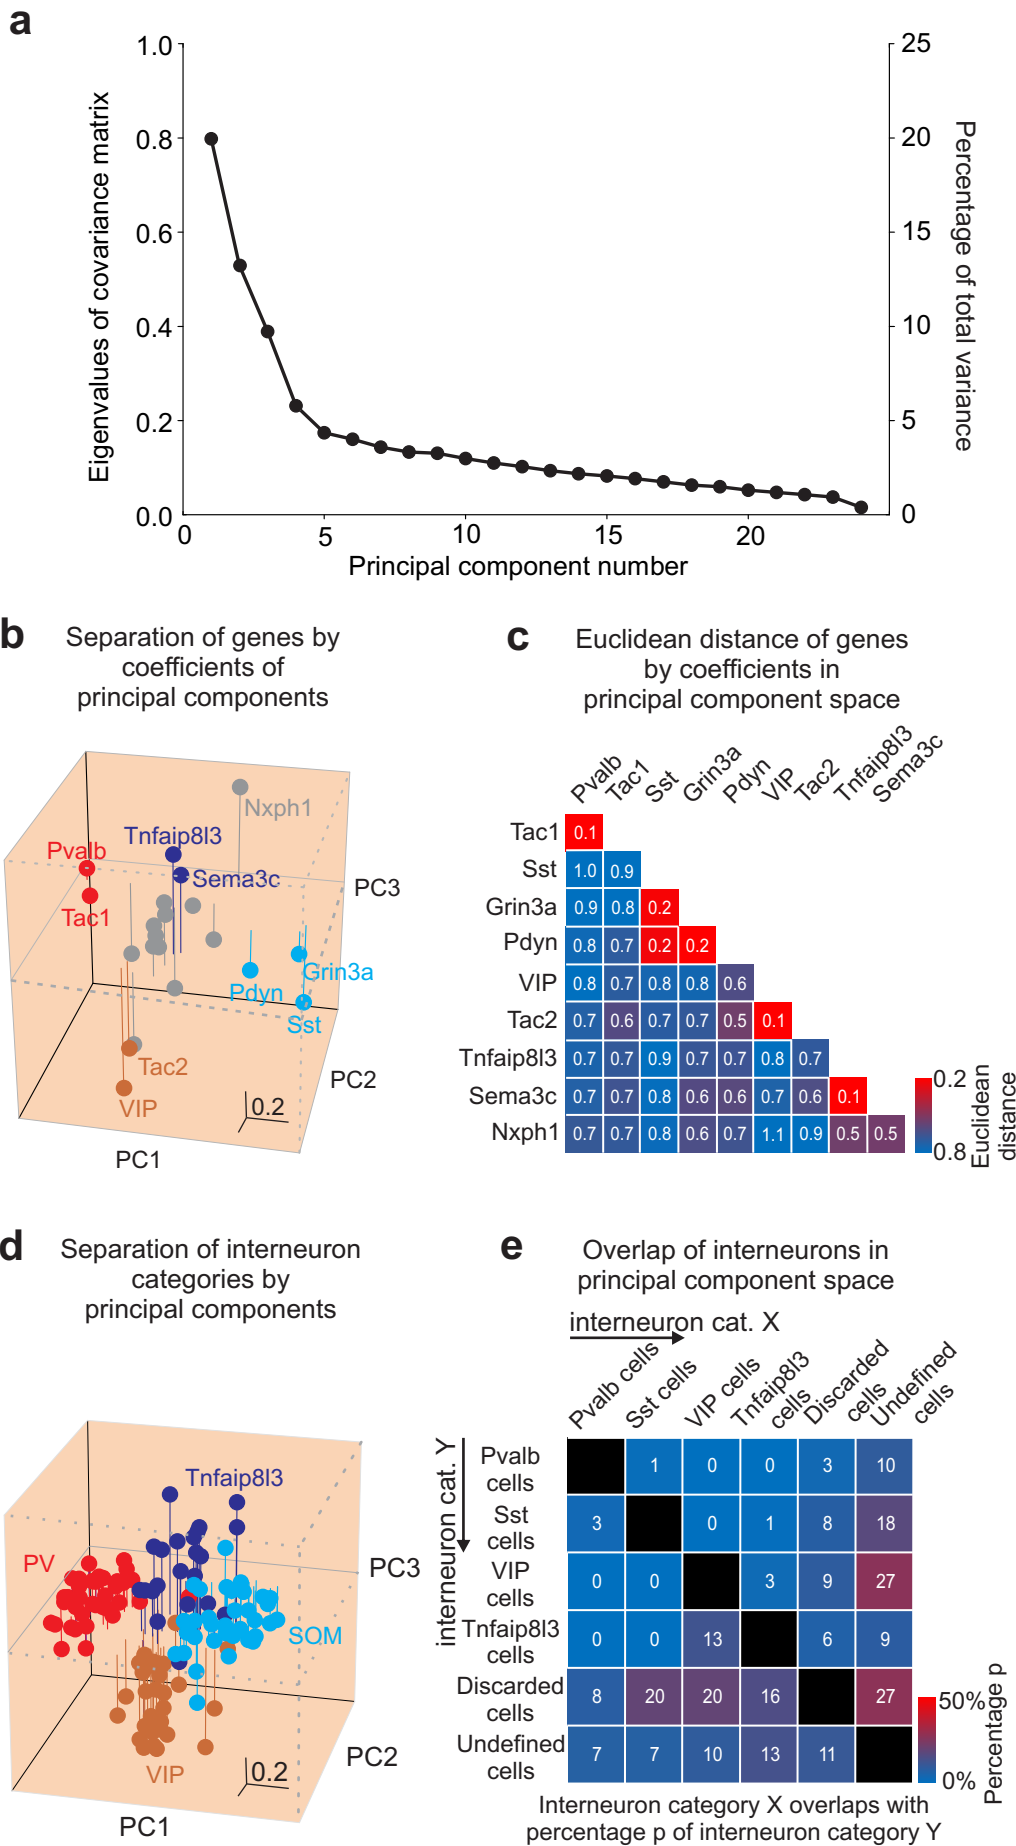

## Supplementary Figure 4

### Principal Component Analysis, gene clustering and cell separation

a) Scree plot showing the eigenvalues of the covariance matrix for each principal component obtained from the analysis of the single cell RT-PCR gene expression of all 474 cells. The first 4 principal components account for more than 50% of the total variance.

b) 3D representation of the coefficients of the first three principal components (PC1-3) for all genes. Genes which show the largest distance to the mean are color coded. Nearest neighbors have the same color (see methods for details on calculation). Note that nearest neighbors correspond to **primary/secondary marker pairs or triplets** as defined by expression analysis (Fig. 2): **Pvalb/Tac1**, **Sst/Grin3a/Pdyn**, **VIP/Tac2** and **Tnfaip813/Sema3c**. Scale bars represent distance in Euclidean space.

c) Heat map of the Euclidean distance of the coefficients of principal components of selected genes for the principal components 1-4. Note the short distances (red squares) between primary and secondary markers.

d) 3D representation of the first three principal components (PC1-3) for individual interneurons. The individual cells were color coded for the gene clusters (Pvalb-red, Sst-blue, VIP-brown, Tnfaip813-green) as determined in (b) (see methods). The data set was reduced randomly by a factor of 2 for clarity. Cells defined as 'discarded' or 'undefined' were omitted. Note the clear separation of the four cell categories as defined by expression analysis (Fig. 2). Scale bars represent distance in Euclidean space.

e) Heat map of the overlap between cell categories in Euclidean space, as defined by the principal components PC1-4 (for details on quantification see methods). Percentage p (given by number and color of heat map) of cells in interneuron categories listed on the X-axis (interneuron cat. X) overlaps with the interneuron category listed on the Y-axis (interneuron cat. Y). E.g. 3% of PV cells overlap with the SOM cell category, whereas 1% of SOM cells overlap with the PV cell category. Note little overlap between cells of defined categories. Undefined cells show the highest overlap with other categories.

# Supplementary Figure 5

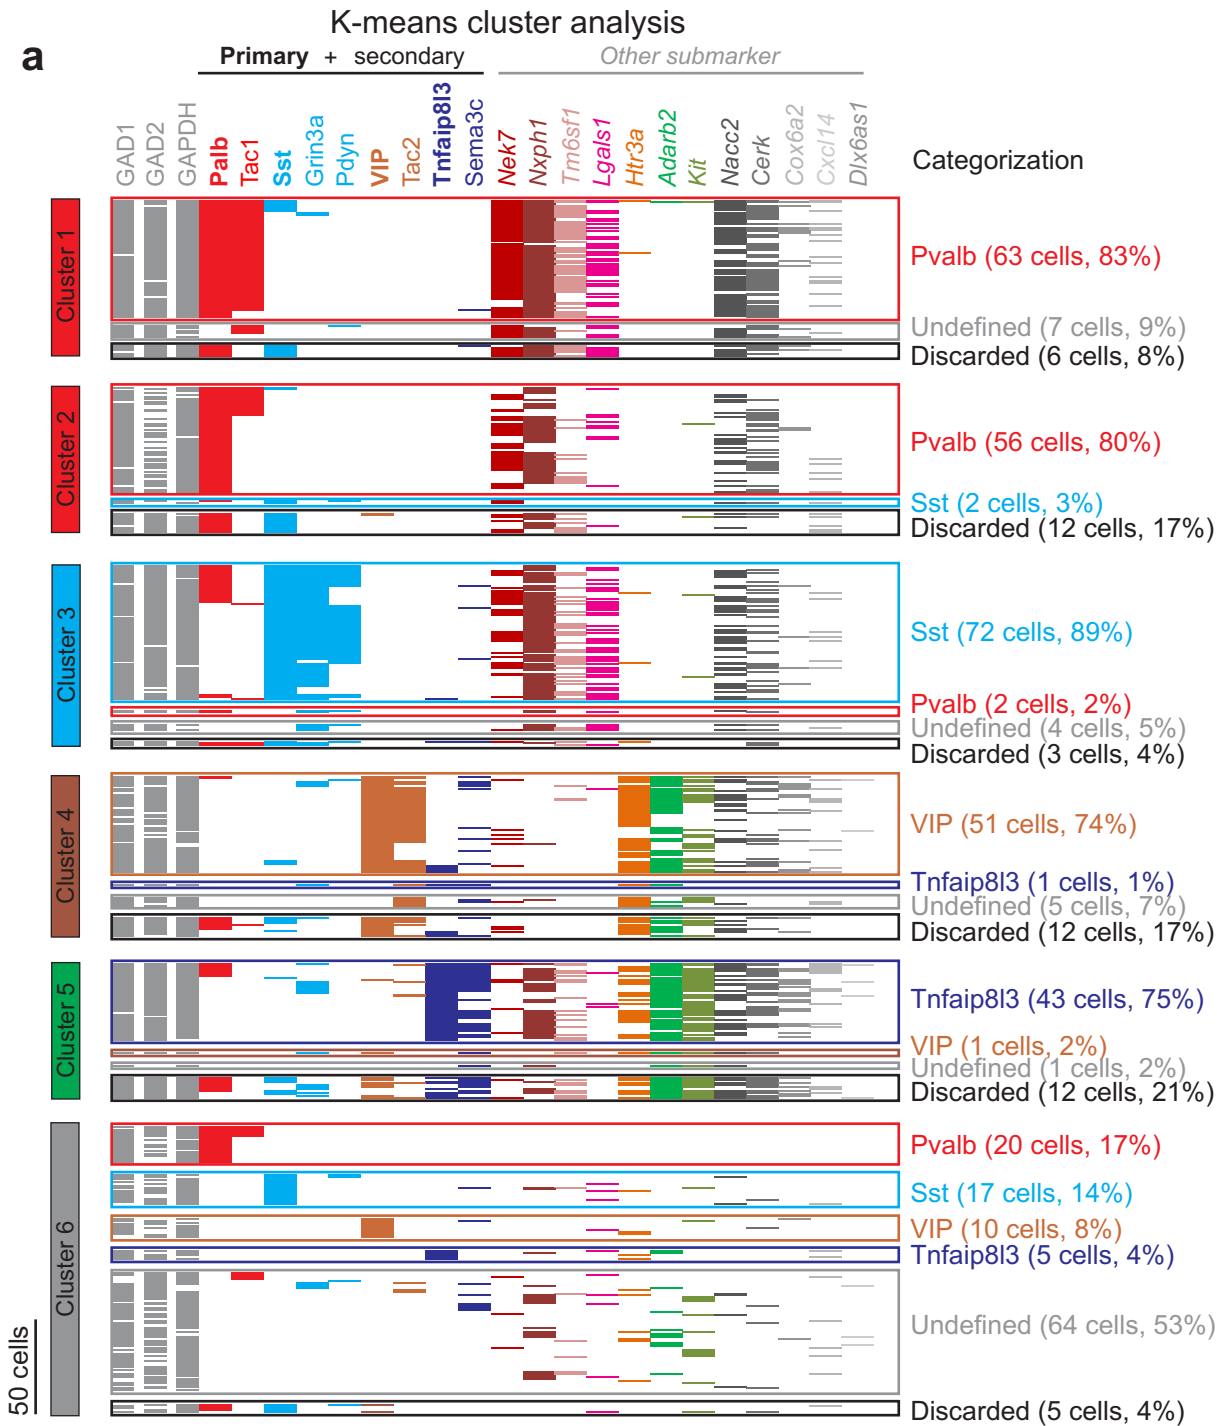

## Supplementary Figure 5

### K-means clustering and Ward's hierarchical clustering

a) Supervised cluster analysis by the kmeans centroid based algorithm. The initial number of clusters was set as 6. The individual cells are sorted according to each kmeans cluster. Each row is a different cell; each column is a different gene. The color of the four primary markers (Pvalb, Sst, VIP, Tnfaip813) is the same as the color of the co-expressed secondary markers. Cells are grouped in different categories (labeled on the right) according to their primary and secondary expression pattern. Note that the vast majority of cells in each cluster 1-5 can be grouped into one of our four molecularly defined interneuron categories defined by expression analysis (Fig. 2) or principal component analysis (Suppl. Fig. 4). Furthermore, the majority of undefined cells are grouped into cluster 6.

b) Hierarchical tree as defined by Ward's method based on linkage distance between genes. Note that the color coded genes form clusters that match well the cell categories defined by expression analysis (Fig. 2), principal component analysis (Suppl. Fig. 4), or k-means clustering (Suppl. Fig 5a).

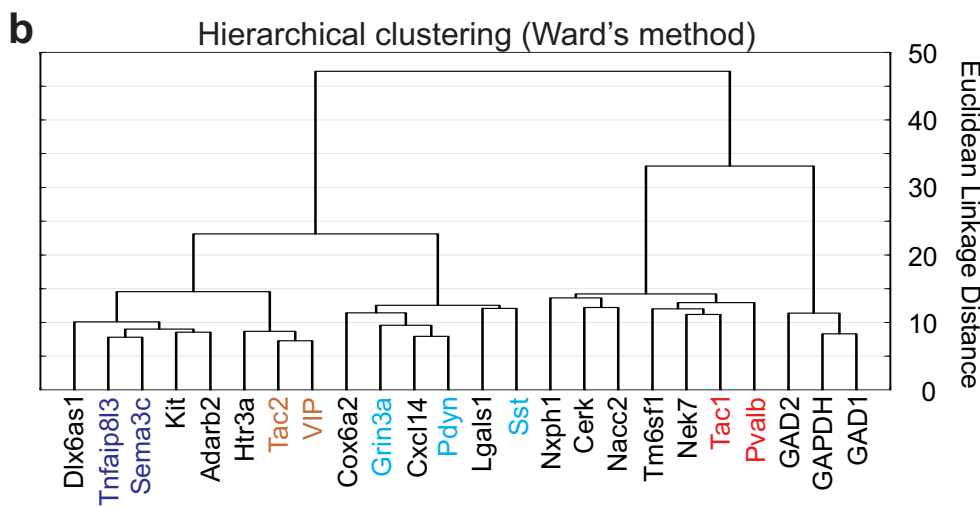

## Supplementary Figure 6

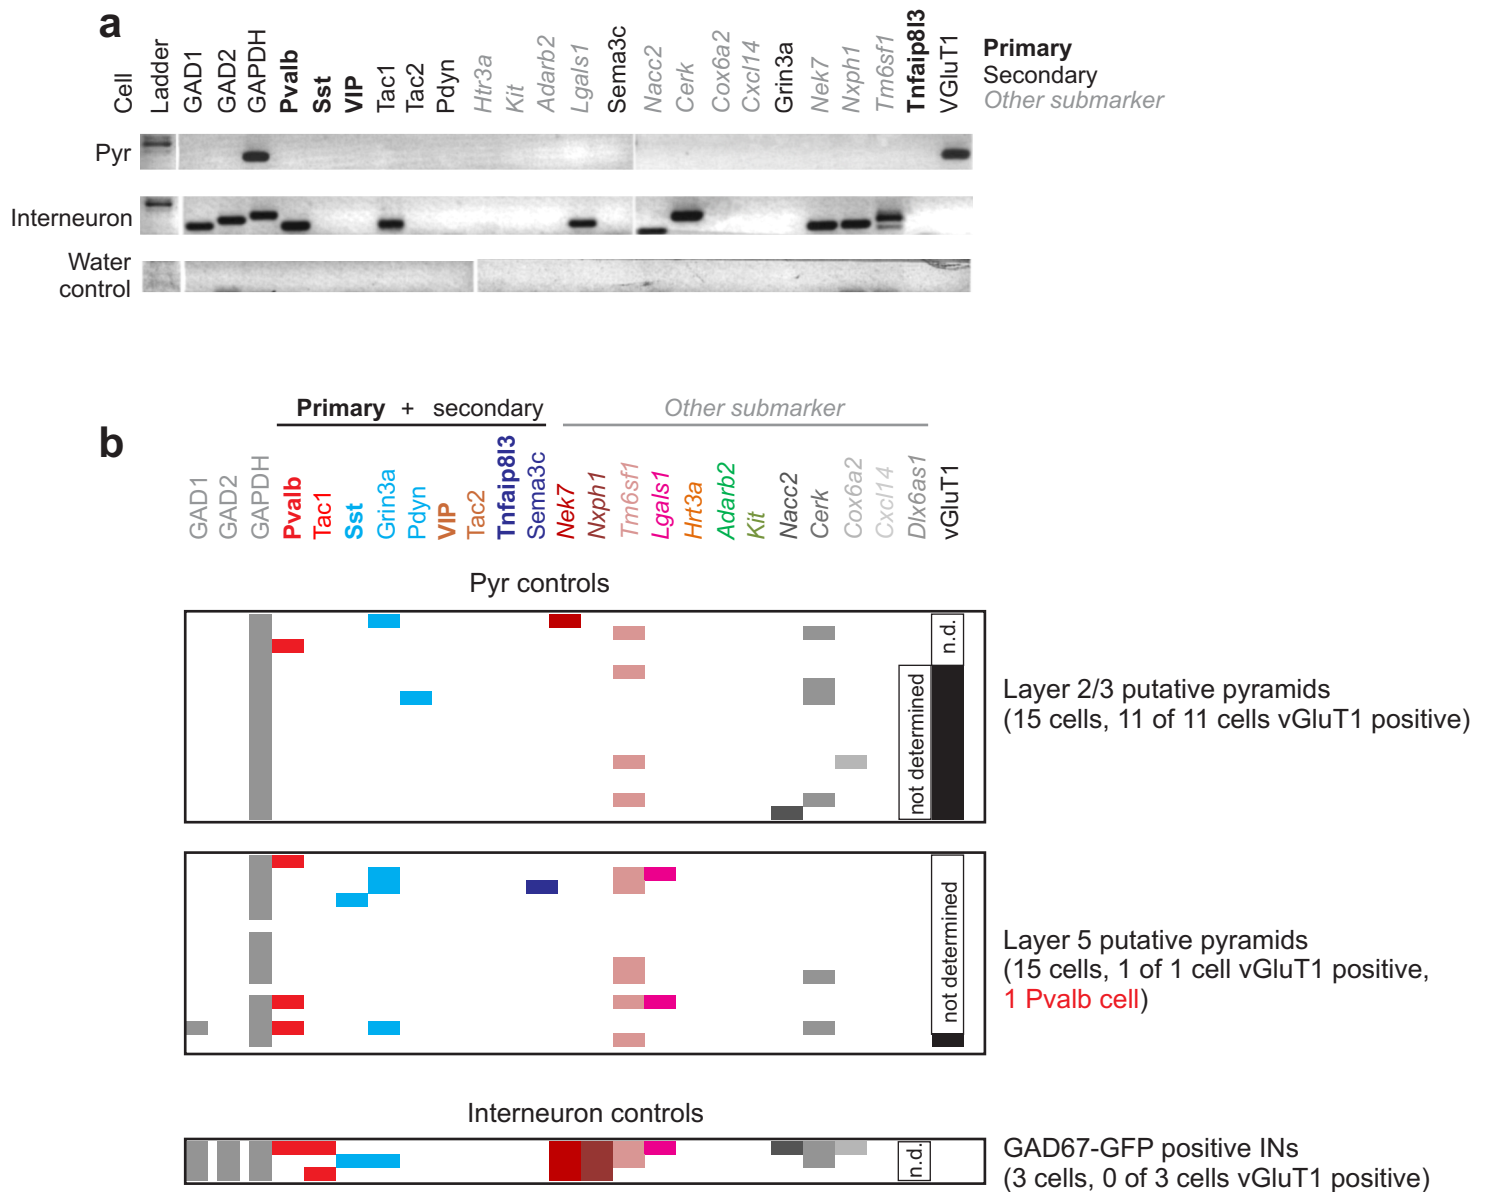

### Supplementary Figure 6

#### Gene expression controls in single cell RT-PCR

a) Agarose gels stained for DNA illustrating the single cell RT-PCR products from 24 genes (listed above) from a layer 5 pyramidal cell (Pyr), an interneuron and the water control used to determine PCR product contamination. The interneuron expresses GAD1, GAD2, and GAPDH but not VgluT1, whereas the pyramid expressed only GAPDH and VgluT1. The lower, partially cut, faint bands in the water control are the monomers or dimers of unused primer DNA.

b) Expression pattern of marker genes in pyramids of layers 2/3 and 5. Each row is a different cell; each column is a different gene. Primary and secondary marker genes can be found occasionally in pyramids. Note that only one cell out of 30 putative PCs can be classified as a Pvalb-interneuron (second last in layer 5 pyramid frame), indicating that the combination of markers defining interneurons is highly specific for interneurons. Note that 3 layer 5 and 1 layer 2/3 pyramids express Pvalb, which is consistent with published findings (see methods on interneuron overlap). n=30 cell, 10 slices, 3 mice.

# Supplementary Figure 7

## Pairwise statistical comparison of individual neuronal contribution

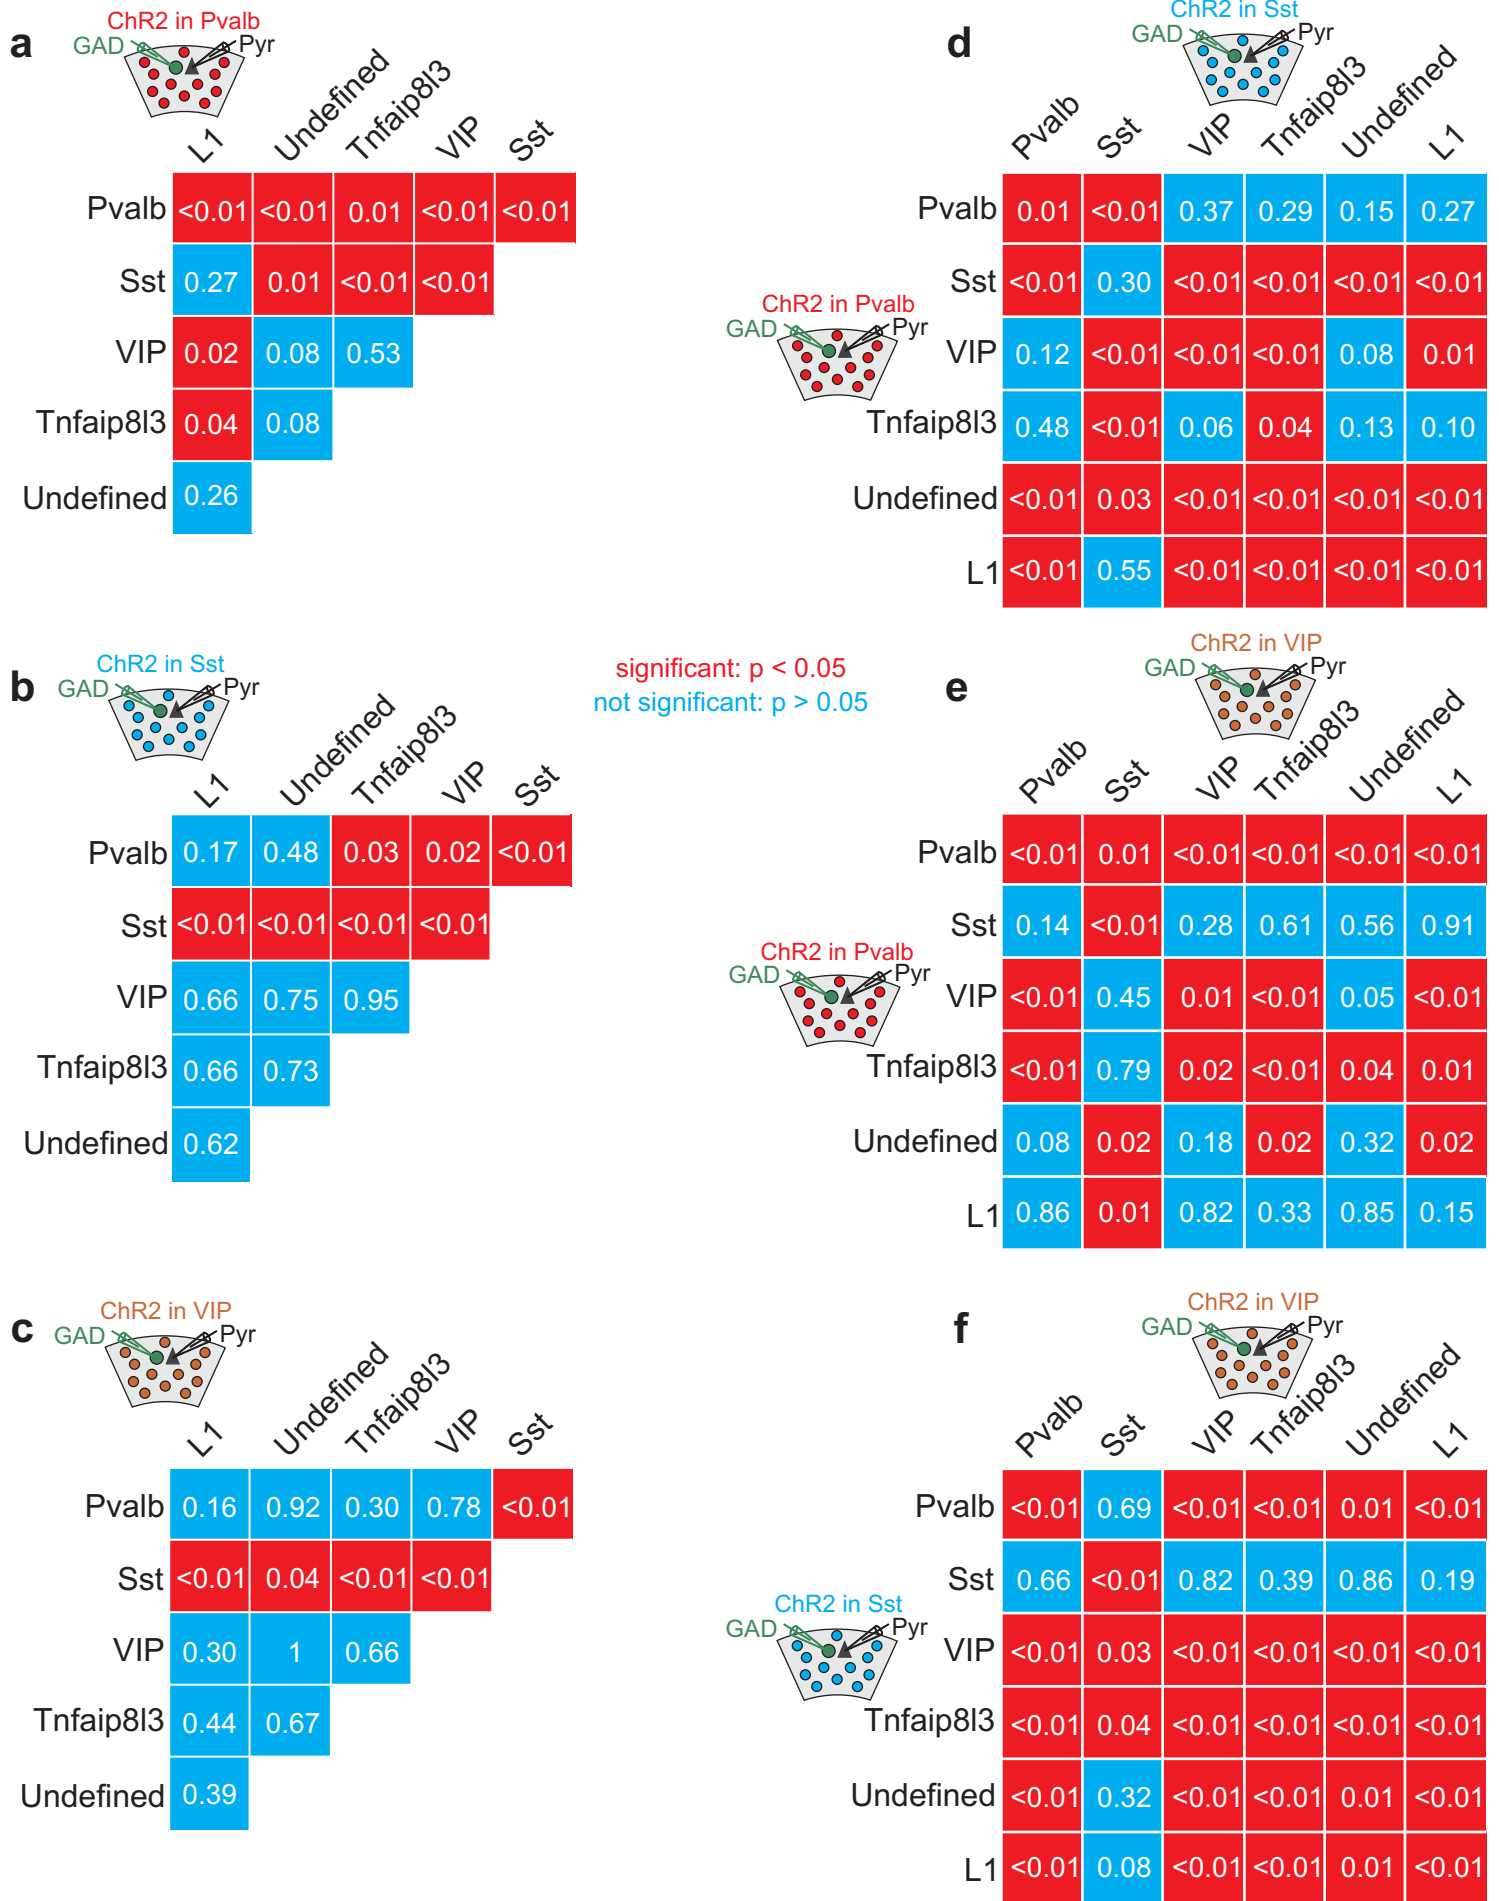



## **Supplementary Figure 7**

### **Statistical comparisons of INCs across interneuron categories**

a,b,c) P-values (2-sided Mann-Whitney) between INCs of different postsynaptic interneuron categories for inhibition generated by the photoactivation of each of the three presynaptic interneuron classes: Pvalb-Cre (a); Sst-Cre (b); VIP-Cre (c). Schematics of the experimental configuration are shown above.

d,e,f) P-values (2-sided Mann-Whitney) between INCs of postsynaptic interneuron categories for inhibition generated by photoactivation of different presynaptic interneuron classes: Pvalb-Cre vs. Sst-Cre (d); Pvalb-Cre vs. VIP-Cre (e); Sst-Cre vs. VIP-Cre (f). Schematics of the experimental configuration are shown to the left and above.

## Supplementary Figure 8

### Intrinsic spiking properties and postsynaptic interneuron category

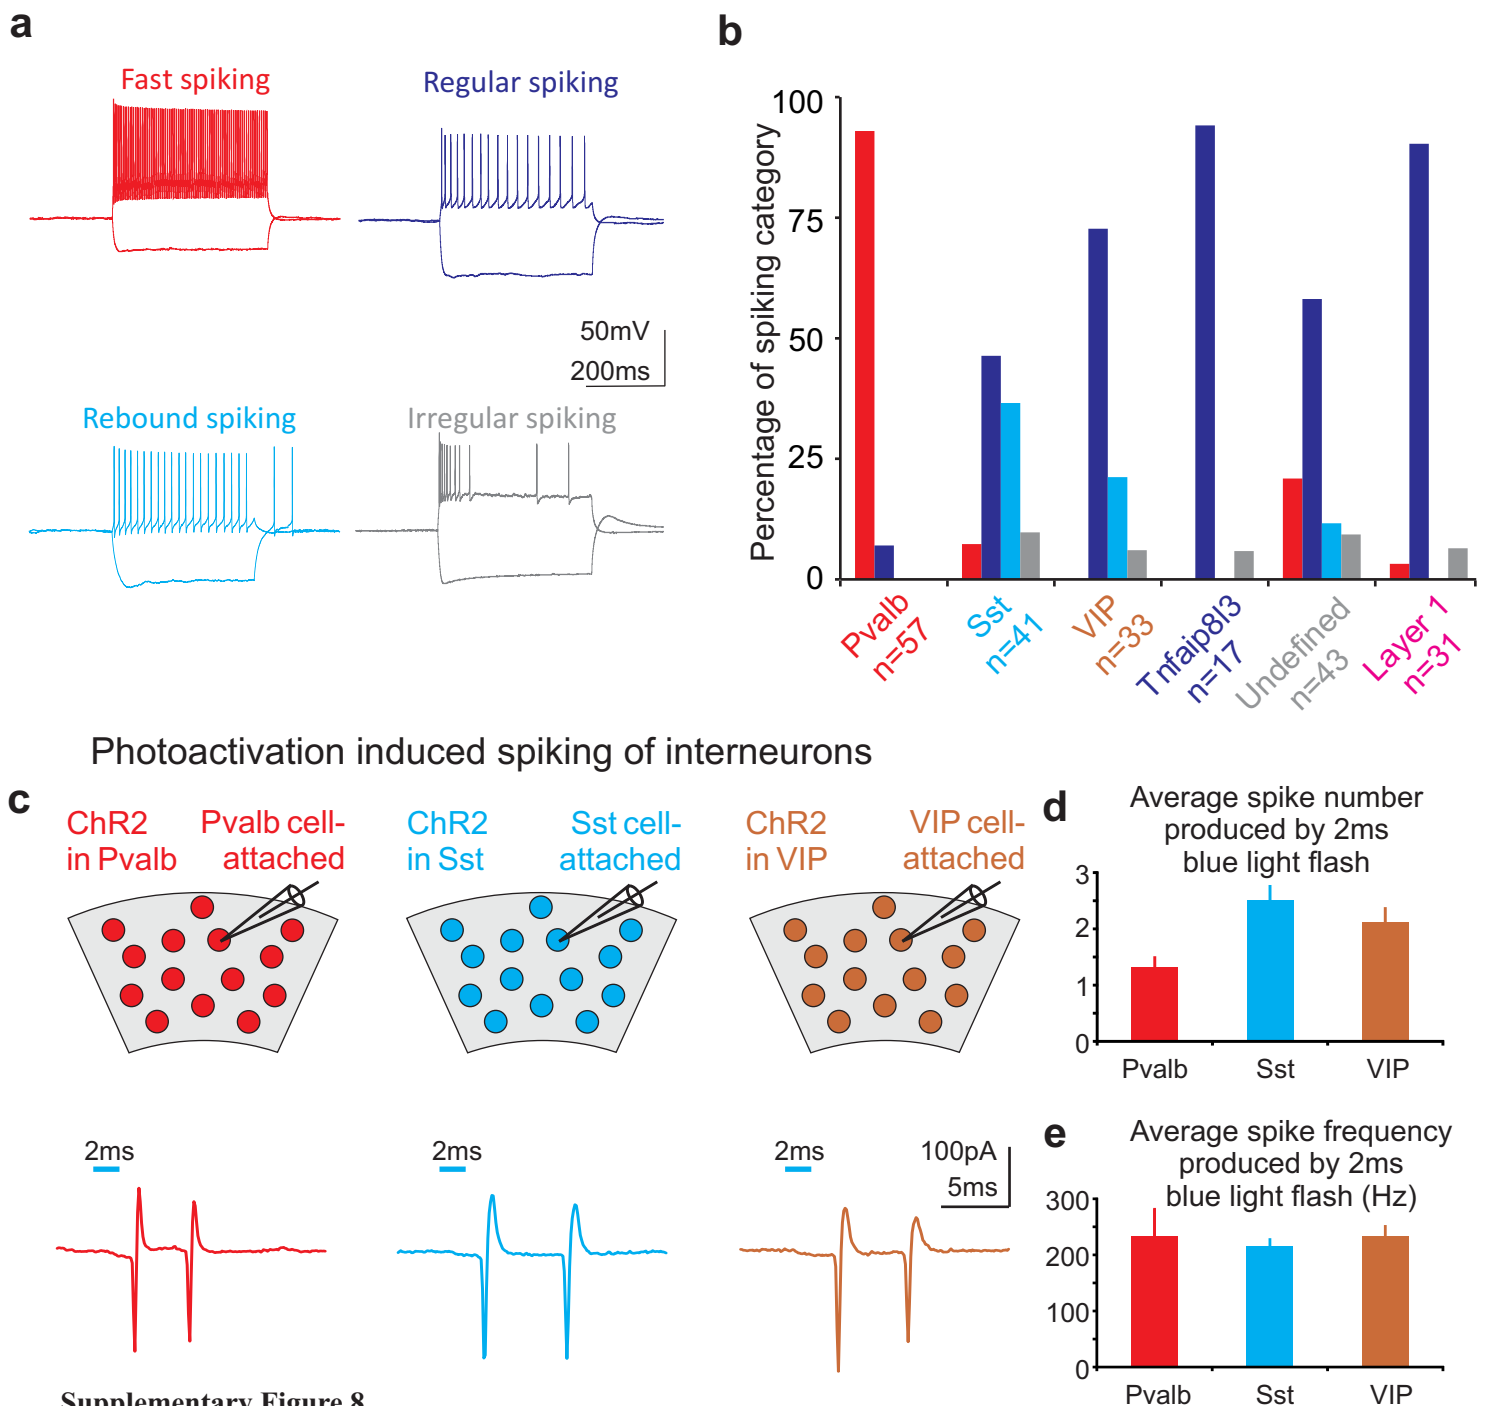

### Supplementary Figure 8

#### Intrinsic and photoinduced spiking of molecularly defined interneuron categories

a) The four predominant spiking patterns recorded in interneurons in response to current injection.

b) Distribution of spiking patterns according to interneuron category. (Pvalb: n=57, 20 slices, 8 mice; Sst: 41 cells, 17 slices, 6 mice; VIP: 33 cell, 15 slices, 5 mice; Tnfaip8l3: 17 cells, 15 slices, 6 mice; Undefined: 43 cells, 20 slices, 10 mice; L1: 31 cells, 16 slices, 6 mice)

c) Full field 2ms photo-stimulation elicits multiple spikes in interneurons expressing ChR2 recorded in cell-attached mode. Schematics of recording condition shown above each sample trace from a cell attached recording of molecularly different interneurons (Pvalb – red, Sst – blue, VIP – brown).

d) Histogram of average spike number (Pvalb – red =  $1.32 \pm 0.17$ , n=10, 5 slices, 3 mice; Sst – blue =  $2.52 \pm 0.24$ , n=19, 6 slices, 3 mice; VIP – brown =  $2.13 \pm 0.24$ , n=17, 6 slices, 3 mice; values are given as mean  $\pm$  s.e.m)

## Supplementary Figure 9

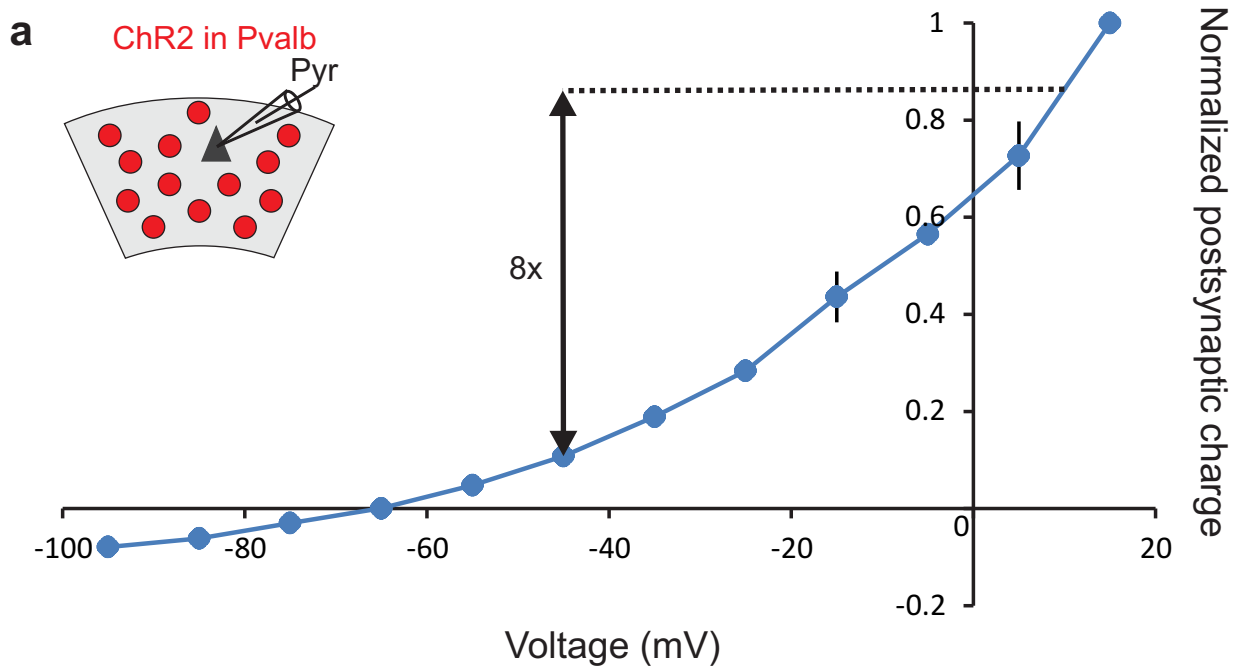

### Supplementary Figure 9

#### Charge voltage relationship of inhibitory postsynaptic currents

Charge voltage relationship of the IPSCs recorded in pyramidal cells in response to Pvalb-cell photostimulation (inset: schematic of experimental configuration). The IPSC value is normalized by the value measured at +15 mV. Inhibition at +10mV is 8x larger than the inhibition measured at -45mV (n=6 cells, 3 slices, 2 mice; error bars show s.e.m)

### Supplementary table 1:

| <b>gene (multiplex/nested -PCR)</b> | <b>primer sequence 5'&gt;3'</b> |
|-------------------------------------|---------------------------------|
| GAD1 sense (multiplex)              | cacaggtcaccctcgattt             |
| GAD1 antisense (multiplex)          | tctatgccgctgagtttg              |
| GAD1 sense (nested)                 | tagctggtgaatggctgaca            |
| GAD1 antisense (nested)             | cttgaacgagcagccatga             |
| GAD2 sense (multiplex)              | cagccttagggattggaaca            |
| GAD2 antisense (multiplex)          | accagtagtccccttgct              |
| GAD2 sense (nested)                 | gttccttctctggtgagtc             |
| GAD2 antisense (nested)             | tgcatcagtcctctctct              |
| GAPDH sense (multiplex)             | actccactcacggcaaattc            |
| GAPDH antisense (multiplex)         | cacattggggtaggaacac             |
| GAPDH sense (nested)                | agcttgcatacaacgggaag            |
| GAPDH antisense (nested)            | gtcatgagccctccacaat             |
| Pvalb sense (multiplex)             | ggatgctgatgacagacgtg            |
| Pvalb antisense (multiplex)         | cagccaccagagtggagaat            |
| Pvalb sense (nested)                | cagcgctgaggacatcaag             |
| Pvalb antisense (nested)            | ctgaggagaagccctcaga             |
| Sst sense (multiplex)               | agatgctgtcctgccgtct             |
| Sst antisense (multiplex)           | gggccaggagtaaggaaga             |
| Sst sense (nested)                  | cccagactccgtcagtttct            |
| Sst antisense (nested)              | gaagtcttcagccagctt              |
| VIP sense (multiplex)               | cagaagcaagcctcagttcc            |
| VIP antisense (multiplex)           | gcagaatctccctactgct             |
| VIP sense (nested)                  | ggtgaccctgaccaagtctc            |
| VIP antisense (nested)              | gtgaagacggcatcagagtg            |
| Tac1 sense (multiplex)              | cagaggaaatcgatgccaac            |
| Tac1 antisense (multiplex)          | gcatcgcttctttcat                |
| Tac1 sense (nested)                 | accagatcaaggaggcaatg            |
| Tac1 antisense (nested)             | gccattagtccaacaaagg             |
| Tac2 sense (multiplex)              | ctcagctggcttgacct               |
| Tac2 antisense (multiplex)          | aaagctgggggtgtctctt             |
| Tac2 sense (nested)                 | agggagggaggctcagtaag            |
| Tac2 antisense (nested)             | tctggtggctgtcctctt              |
| Pdyn sense (multiplex)              | tcctcgtgatgccctctaat            |
| Pdyn antisense (multiplex)          | ccatctcggaactcctcttg            |
| Pdyn sense (nested)                 | tgcatgaggattcaggatg             |
| Pdyn antisense (nested)             | ggctttctccagctcctc              |
| Htr3a sense (multiplex)             | taccaccagcctgctctac             |
| Htr3a antisense (multiplex)         | gacctcacttctccgggta             |
| Htr3a sense (nested)                | gtcagaccacctcctggcta            |
| Htr3a antisense (nested)            | ctgcacatcaaaggggaagt            |
| Adarb2 sense (multiplex)            | aggttacaggctgcgagaaa            |
| Adarb2 antisense (multiplex)        | ctgctggcctcacagtaca             |
| Adarb2 sense (nested)               | tcctgcacagacaagattgc            |
| Adarb2 antisense (nested)           | ctcacgccactaaggagagg            |
| Kit sense (multiplex)               | gccctaatgtcggaaactgaa           |
| Kit antisense (multiplex)           | aggagaagagctcccagagg            |
| Kit sense (nested)                  | acaagaggagatccgcaaga            |

**gene (multiplex/nested -PCR)**

Kit antisense (nested)  
Lgals1 sense (multiplex)  
Lgals1 antisense (multiplex)  
Lgals1 sense (nested)  
Lgals1 antisense (nested)  
Sema3c sense (multiplex)  
Sema3c antisense (multiplex)  
Sema3c sense (nested)  
Sema3c antisense (nested)  
Nacc2 sense (multiplex)  
Nacc2 antisense (multiplex)  
Nacc2 sense (nested)  
Nacc2 antisense (nested)  
Cerk sense (multiplex)  
Cerk antisense (multiplex)  
Cerk sense (nested)  
Cerk antisense (nested)  
Cox6a2 sense (multiplex)  
Cox6a2 antisense (multiplex)  
Cox6a2 sense (nested)  
Cox6a2 antisense (nested)  
Cxcl14 sense (multiplex)  
Cxcl14 antisense (multiplex)  
Cxcl14 sense (nested)  
Cxcl14 antisense (nested)  
Grin3a sense (multiplex)  
Grin3a antisense (multiplex)  
Grin3a sense (nested)  
Grin3a antisense (nested)  
Nek7 sense (multiplex)  
Nek7 antisense (multiplex)  
Nek7 sense (nested)  
Nek7 antisense (nested)  
Nxph1 sense (multiplex)  
Nxph1 antisense (multiplex)  
Nxph1 sense (nested)  
Nxph1 antisense (nested)  
Tm6sf1 sense (multiplex)  
Tm6sf1 antisense (multiplex)  
Tm6sf1 sense (nested)  
Tm6sf1 antisense (nested)  
Tnfaip8l3 sense (multiplex)  
Tnfaip8l3 antisense (multiplex)  
Tnfaip8l3 sense (nested)  
Tnfaip8l3 antisense (nested)  
Dlx6as1 sense (multiplex)  
Dlx6as1 antisense (multiplex)  
Dlx6as1 sense (nested)  
Dlx6as1 antisense (nested)

**primer sequence 5'>3'**

aaatgctctctggtgccatc  
ctctcgggtggagtctctg  
aggccacgcacttaatcttg  
tcaaacctggggaatgtctc  
agcttgatggtcaggtcagc  
gatggcccagagacacattt  
tagatatggcagcgatgcag  
atatcctcgcccaggaactt  
acgtggtatctccatcagc  
agcatccagcaggtacccta  
cagttcacagcgttcagga  
atggtggaggagcagtatgg  
tctccaggatctccctctga  
ggggactcactggcaataga  
agaggtctgtccttcgaga  
cggggacttaatcaaggaca  
gcactccggataaggatga  
ctctcgactgggtgaaggag  
accatgctgttccaaagag  
ttcctagcctcccttgaca  
gggtgtgatacgggatgaac  
ctccttgctccctgctc  
agtctcaactggcctgga  
gtgtaagtgtcccgaagg  
tccatgatcgtccaccctat  
ccctaaatgctggactggaa  
ttgattcgtgtagcagcag  
attggtctccctccaactc  
gaatcctatgcacagcagca  
gaaggcattacggccagata  
ctgtcgccgtagaaaggac  
agcagatgctggtgacctt  
gagctgaaaaaccgaccaag  
gcgtgctggtacgttctct  
ttccctgaccagtggagtt  
cccaccgtctactggtcac  
cagtcccagaggcttgctc  
gcttgaaacatcgtaggaa  
ggtacaacggtaggcaaga  
agtatgggacacggattgc  
gcagggtccttaggtaggg  
tcagattctggagagcagagc  
agtttccatgctggaccatag  
actgctgcaggctcctcatgt  
gccacctgatagcatcctt  
agctggaggcttggtcaga  
taagaggtcagcgtccaat  
aggaacggggatattgaac  
tccagctggtcatctctga

vGluT1 sense (multiplex)  
vGluT1 antisense (multiplex)  
vGluT1 sense (nested)  
vGluT1 antisense (nested)

ctggggccttgtagtat  
gaaatgccatcaagatgct  
ctgaggaggagcgcaaatac  
agcttcgcacgttgtagt
